# Supplementary material for: Breast Cancer Disclosure in Iranian Families: A Qualitative Study of Family Roles and Women’s Agency in Managing Disclosure
Source: Research Square preprint supplement (doi:10.21203/rs.3.rs-8311532/v1), 2025-12-16
Supplement: Supplementary file 1 [file f54d0713238a84b743800026.docx]

**Semi-Structured Interview Guide**

Study Title: Disclosure of Illness in Iranian Families: The Role of Family and Women’s Agency

This semi-structured interview guide was developed specifically for the present study to explore women’s experiences regarding the disclosure of breast cancer within their families and the role of family dynamics and women’s agency in this process.

**Interview Questions**

1. Who was the first person (or who were the first people) informed about your diagnosis?

2. Why did you choose to tell them? Why do you think family members should be informed about the illness?

3. Who accompanied you during the different stages of diagnosis and treatment?

4. What expectations did you have from your family after disclosing your diagnosis?

5. How did different family members react after you disclosed your breast cancer?

6. How did you feel when you talked with family members about your illness and your emotions?

7. Why did you decide to withhold some details of your illness from certain family members?

8. In your opinion, is disclosing breast cancer different from disclosing other illnesses? Why?

9. What challenges did you face when disclosing your breast cancer within the family?

10. What types of support did you receive from your family after the disclosure?

11. Why do you think some families prefer not to disclose a breast cancer diagnosis to others?

12. Did you agree with your family's views or decisions about disclosing (or not disclosing) your breast cancer? Why or why not?

13. How did you feel about other people outside the family knowing about your illness?

14. What actions did you personally take regarding the disclosure of your illness?
